# Supplementary material
Source: ML conference proceedings conference paper supplement (https://openreview.net/forum?id=Ulj0tR-k7q)
Supplement: supplementary_material [file attachment]

# Supplementary files for “On strong convergence of the two-tower model for recommender system”

**Anonymous authors**

Paper under double-blind review

**Proof of Theorem 1.** Note that  $R^*(\mathbf{x}_u, \tilde{\mathbf{x}}_i) = \langle \mathbf{f}^*(\mathbf{x}_u), \tilde{\mathbf{f}}^*(\tilde{\mathbf{x}}_i) \rangle$  with  $f_j^* \in \mathcal{H}(\beta, [0, 1]^{D_u}, M)$  and  $\tilde{f}_j^* \in \mathcal{H}(\beta, [0, 1]^{D_i}, M)$ . It follows from Theorem 5 in Nakada and Imaizumi (2020) that there exist  $\mathcal{F}_{D_u}(W, L, B, M)$  and  $\mathcal{F}_{D_i}(\tilde{W}, \tilde{L}, \tilde{B}, M)$  with  $W = O(\epsilon^{-d_u/\beta})$ ,  $\tilde{W} = O(\epsilon^{-d_i/\beta})$ ,  $B = O(\epsilon^{-s})$  and  $\tilde{B} = O(\epsilon^{-s})$  such that for each  $j$ , we have

$$\begin{aligned} \inf_{f_j \in \mathcal{F}_{D_u}(W, L, B, M)} \|f_j - f_j^*\|_{L^\infty(\mu_u)} &\leq \epsilon, \\ \inf_{\tilde{f}_j \in \mathcal{F}_{D_i}(\tilde{W}, \tilde{L}, \tilde{B}, M)} \|\tilde{f}_j - \tilde{f}_j^*\|_{L^\infty(\mu_i)} &\leq \epsilon. \end{aligned} \quad (1)$$

By the triangle inequality and the Cauchy-Schwartz inequality, we have that

$$\begin{aligned} |R(\mathbf{x}_u, \tilde{\mathbf{x}}_i) - R^*(\mathbf{x}_u, \tilde{\mathbf{x}}_i)| &= |\langle \mathbf{f}(\mathbf{x}_u), \tilde{\mathbf{f}}(\tilde{\mathbf{x}}_i) \rangle - \langle \mathbf{f}^*(\mathbf{x}_u), \tilde{\mathbf{f}}^*(\tilde{\mathbf{x}}_i) \rangle| \\ &\leq |\langle \mathbf{f}(\mathbf{x}_u), \tilde{\mathbf{f}}(\tilde{\mathbf{x}}_i) - \tilde{\mathbf{f}}^*(\tilde{\mathbf{x}}_i) \rangle| + |\langle \mathbf{f}(\mathbf{x}_u) - \mathbf{f}^*(\mathbf{x}_u), \tilde{\mathbf{f}}^*(\tilde{\mathbf{x}}_i) \rangle| \\ &\leq \|\mathbf{f}(\mathbf{x}_u)\|_2 \|\tilde{\mathbf{f}}(\tilde{\mathbf{x}}_i) - \tilde{\mathbf{f}}^*(\tilde{\mathbf{x}}_i)\|_2 + \|\mathbf{f}(\mathbf{x}_u) - \mathbf{f}^*(\mathbf{x}_u)\|_2 \|\tilde{\mathbf{f}}^*(\tilde{\mathbf{x}}_i)\|_2. \end{aligned}$$

Since  $\mathbf{f} \in \mathcal{F}_{D_u}(W, L, B, M)$  and  $\tilde{\mathbf{f}}^* \in \mathcal{H}^p(\beta, [0, 1]^{D_i}, M)$ , we have  $\|\mathbf{f}(\mathbf{x}_u)\|_2 \leq 2\sqrt{p}M$  and  $\|\tilde{\mathbf{f}}^*(\tilde{\mathbf{x}}_i)\|_2 \leq \sqrt{p}M$ , which further implies that

$$|R(\mathbf{x}_u, \tilde{\mathbf{x}}_i) - R^*(\mathbf{x}_u, \tilde{\mathbf{x}}_i)| \leq M \left( 2 \sum_{j=1}^p \|\tilde{f}_j - \tilde{f}_j^*\|_{L^\infty(\mu_i)} + \sum_{j=1}^p \|f_j - f_j^*\|_{L^\infty(\mu_u)} \right).$$

Let  $\Phi = (W, L, B, M, \tilde{W}, \tilde{L}, \tilde{B})$ , it then follows from (1) that

$$\begin{aligned} \inf_{\mathbb{R} \in \mathcal{R}^\Phi} |R(\mathbf{x}_u, \tilde{\mathbf{x}}_i) - R^*(\mathbf{x}_u, \tilde{\mathbf{x}}_i)| &= \inf_{f_j \in \mathcal{F}_{D_u}(W, L, B, M), \tilde{f}_j \in \mathcal{F}_{D_i}(\tilde{W}, \tilde{L}, \tilde{B}, M)} |R(\mathbf{x}_u, \tilde{\mathbf{x}}_i) - R^*(\mathbf{x}_u, \tilde{\mathbf{x}}_i)| \\ &\leq M \left( 2 \sum_{j=1}^p \inf_{f_j \in \mathcal{F}_{D_u}(W, L, B, M)} \|\tilde{f}_j - \tilde{f}_j^*\|_{L^\infty(\mu_i)} + \sum_{j=1}^p \inf_{\tilde{f}_j \in \mathcal{F}_{D_i}(\tilde{W}, \tilde{L}, \tilde{B}, M)} \|f_j - f_j^*\|_{L^\infty(\mu_u)} \right) \\ &\leq 3pM\epsilon. \end{aligned}$$

This completes the proof of Theorem 1. ■

**Proof of Lemma 1.** For  $\mathbf{f}(\mathbf{x}) \in \mathcal{F}_D(W, L, B, M)$  with  $U(\mathbf{f}) \leq L$ , we let  $\mathbf{y}_l$  denote the output of the  $l$ -th layer of  $\mathbf{f}$  and  $\Theta = ((\mathbf{A}_1, \mathbf{b}_1), (\mathbf{A}_2, \mathbf{b}_2), \dots, (\mathbf{A}_{U(\mathbf{f})}, \mathbf{b}_{U(\mathbf{f})}))$  the parameter of  $\mathbf{f}$ , where  $\mathbf{A}_l \in [-B, B]^{p_l \times p_{l-1}}$ ,  $\mathbf{b}_l \in [-B, B]^{p_l}$ ,  $p_0 = D$  and  $p_{U(\mathbf{f})} = p$ . We then construct  $\mathbf{f}' = Q(\mathbf{f})$  with  $\Theta' = ((\mathbf{A}'_1, \mathbf{b}'_1), (\mathbf{A}'_2, \mathbf{b}'_2), \dots, (\mathbf{A}'_L, \mathbf{b}'_L))$  as follows.

For  $l = 1$ , we let  $\mathbf{A}'_1 = (\mathbf{A}_1^T, \mathbf{0}_{D \times (2W - p_1)})^T$  and  $\mathbf{b}'_1 = (\mathbf{b}_1^T, \mathbf{0}_{2W - p_1}^T)^T$ , and then the output of the first layer  $\mathbf{y}'_1$  is given by

$$\mathbf{y}'_1 = \sigma(\mathbf{A}'_1 \mathbf{x} + \mathbf{b}'_1) = \begin{pmatrix} \sigma(\mathbf{A}_1 \mathbf{x} + \mathbf{b}_1) \\ \mathbf{0}_{2W - p_1} \end{pmatrix} = \begin{pmatrix} \mathbf{y}_1 \\ \mathbf{0}_{2W - p_1} \end{pmatrix},$$

where  $\sigma(\cdot)$  is the element-wise ReLU function. For  $l = 2, \dots, U(\mathbf{f}) - 1$ , we let  $\mathbf{A}'_l = \text{diag}(\mathbf{A}_l, \mathbf{0}_{(2W - p_l) \times (2W - p_{l-1})})$  and  $\mathbf{b}'_l = (\mathbf{b}_l^T, \mathbf{0}_{2W - p_l}^T)^T$ , and then

$$\mathbf{y}'_l = \sigma(\mathbf{A}'_l \mathbf{y}_{l-1} + \mathbf{b}'_l) = \begin{pmatrix} \sigma(\mathbf{A}_l \mathbf{y}_{l-1} + \mathbf{b}_l) \\ \mathbf{0}_{2W - p_l} \end{pmatrix} = \begin{pmatrix} \mathbf{y}_l \\ \mathbf{0}_{2W - p_l} \end{pmatrix}.$$

The remaining  $(\mathbf{A}'_l, \mathbf{b}'_l)$ 's for  $l = U(\mathbf{f}), \dots, L$  are constructed based on the value of  $U(\mathbf{f})$ . If  $U(\mathbf{f}) = L$ , as the last layer of  $\mathbf{f}$  and  $\mathbf{f}'$  are both linear, we set  $\mathbf{A}'_L = (\mathbf{A}_L, \mathbf{0}_{p \times (2W - p_{L-1})})$  and  $\mathbf{b}'_L = \mathbf{b}_L$ , and then

$$\mathbf{y}'_L = \mathbf{A}'_L \mathbf{y}'_{L-1} + \mathbf{b}'_L = \mathbf{A}_L \mathbf{y}_{L-1} + \mathbf{b}_L = \mathbf{y}_{U(\mathbf{f})}.$$

If  $U(\mathbf{f}) = L - 1$ , we set

$$\mathbf{A}'_{L-1} = \begin{pmatrix} \mathbf{A}_{L-1} & \mathbf{0}_{p_{L-1} \times (2W - p_{L-2})} \\ -\mathbf{A}_{L-1} & \mathbf{0}_{p_{L-1} \times (2W - p_{L-2})} \\ \mathbf{0}_{(2W - 2p_{L-1}) \times p_{L-2}} & \mathbf{0}_{(2W - 2p_{L-1}) \times (2W - 2p_{L-2})} \end{pmatrix}, \mathbf{b}'_{L-1} = \begin{pmatrix} \mathbf{b}_{L-1} \\ -\mathbf{b}_{L-1} \\ \mathbf{0}_{2W - 2p_{L-1}} \end{pmatrix}.$$

Then we have

$$\mathbf{y}'_{L-1} = \sigma(\mathbf{A}'_{L-1} \mathbf{y}'_{L-2} + \mathbf{b}'_{L-1}) = \begin{pmatrix} \sigma(\mathbf{A}_{L-1} \mathbf{y}_{L-2} + \mathbf{b}_{L-1}) \\ \sigma(-\mathbf{A}_{L-1} \mathbf{y}_{L-2} - \mathbf{b}_{L-1}) \\ \mathbf{0}_{2W - 2p} \end{pmatrix}.$$

We further let  $\mathbf{A}'_L = (\mathbf{I}_p, -\mathbf{I}_p, \mathbf{0}_{p \times (2W - 2p)})$  and  $\mathbf{b}_L = \mathbf{0}_p$ , and then

$$\mathbf{y}'_L = \sigma(\mathbf{A}_{L-1} \mathbf{y}_{L-2} + \mathbf{b}_{L-1}) - \sigma(-\mathbf{A}_{L-1} \mathbf{y}_{L-2} - \mathbf{b}_{L-1}) = \mathbf{y}_{U(\mathbf{f})},$$

where the second equality follows from property of the ReLU function that  $\sigma(x) - \sigma(-x) = x$ .

If  $U(\mathbf{f}) \leq L - 2$ , we first construct  $(\mathbf{A}'_l, \mathbf{b}'_l); l = U(\mathbf{f}) + 1, \dots, L - 1$  as

$$\mathbf{A}'_l = \begin{pmatrix} \mathbf{I}_p & -\mathbf{I}_p & \mathbf{0}_{p \times (2W - 2p)} \\ -\mathbf{I}_p & \mathbf{I}_p & \mathbf{0}_{p \times (2W - 2p)} \\ \mathbf{0}_{(2W - 2p) \times p} & \mathbf{0}_{(2W - 2p) \times p} & \mathbf{0}_{(2W - 2p) \times (2W - 2p)} \end{pmatrix} \text{ and } \mathbf{b}'_l = \mathbf{0}_{2W}.$$

Then we have

$$\mathbf{y}'_l = \sigma(\mathbf{A}'_l \mathbf{y}'_{l-1} + \mathbf{b}'_l) = \begin{pmatrix} \sigma(\mathbf{A}_{U(\mathbf{f})} \mathbf{y}_{U(\mathbf{f})-1} + \mathbf{b}_{U(\mathbf{f})}) \\ \sigma(-\mathbf{A}_{U(\mathbf{f})} \mathbf{y}_{U(\mathbf{f})-1} - \mathbf{b}_{U(\mathbf{f})}) \\ \mathbf{0}_{2W - 2p} \end{pmatrix}. \quad (2)$$

We further set  $\mathbf{A}'_L = (\mathbf{I}_p, -\mathbf{I}_p, \mathbf{0}_{p \times (2W - 2p)})$  and  $\mathbf{b}_L = \mathbf{0}_p$ , then we have

$$\mathbf{y}'_L = \sigma(\mathbf{A}_{U(\mathbf{f})} \mathbf{y}_{U(\mathbf{f})-1} + \mathbf{b}_{U(\mathbf{f})}) - \sigma(-\mathbf{A}_{U(\mathbf{f})} \mathbf{y}_{U(\mathbf{f})-1} - \mathbf{b}_{U(\mathbf{f})}) = \mathbf{y}_{U(\mathbf{f})}.$$

By the definition of  $\mathcal{F}_D(W, L, B, M)$ , the non-zero elements of  $\mathbf{A}_l$  is at most  $W$ , and hence the number of non-zero elements in  $\mathbf{A}'_l$  is at most

$$4W + \sum_{s=1}^{2W} (\lfloor \frac{2W}{s} \rfloor + 1) \leq 8W + \sum_{s=2}^{2W} (\frac{2W}{s} \times 1) \leq 8W + \int_1^{2W} \frac{2W}{x} dx \leq 12W \log W,$$

where  $\lfloor \cdot \rfloor$  is the floor function. Similarly, the number of non-zero elements in  $\mathbf{b}'_l$  is less than  $2W \log W$ . The desired result then follows immediately.  $\blacksquare$

**Proof of Lemma 2:** For an  $L$ -layer neural network  $\mathbf{f}(\mathbf{x}; \Theta) \in \mathcal{K}_D(W, L, B, M)$ , its  $l$ -th layer can be formulated as

$$\mathbf{h}_l(\mathbf{x}) = (h_{l1}(\mathbf{x}), h_{l2}(\mathbf{x}), \dots, h_{lp_l}(\mathbf{x})) = \mathbf{A}_l \mathbf{x} + \mathbf{b}_l,$$

where  $h_{li}(\mathbf{x}) = \sum_{j=1}^{p_{l-1}} A_{lij} x_j + b_{li}$ , with  $p_0 = D$  and  $p_{l-1} = 2W$  for  $2 \leq l \leq L$ . It follows from the triangle inequality that

$$\begin{aligned} \sup_{\|\mathbf{x}\|_\infty \leq 1} \|\mathbf{f}(\mathbf{x}) - \mathbf{f}'(\mathbf{x})\|_2 &= \sup_{\|\mathbf{x}\|_\infty \leq 1} \|\mathbf{h}_L \circ \mathbf{h}_{L-1} \circ \dots \circ \mathbf{h}_1(\mathbf{x}) - \mathbf{h}'_L \circ \mathbf{h}'_{L-1} \circ \dots \circ \mathbf{h}'_1(\mathbf{x})\|_2 \\ &\leq \sup_{\|\mathbf{x}\|_\infty \leq 1} \|\mathbf{f}(\mathbf{x}) - \mathbf{g}_{L-1}(\mathbf{x}) + \mathbf{g}_{L-1}(\mathbf{x}) - \mathbf{g}_{L-2}(\mathbf{x}) + \dots + \mathbf{g}_1(\mathbf{x}) - \mathbf{f}'(\mathbf{x})\|_2 \\ &\leq \sup_{\|\mathbf{x}\|_\infty \leq 1} \|\mathbf{g}_L(\mathbf{x}) - \mathbf{g}_{L-1}(\mathbf{x})\|_2 + \dots + \sup_{\|\mathbf{x}\|_\infty \leq 1} \|\mathbf{g}_1(\mathbf{x}) - \mathbf{g}_0(\mathbf{x})\|_2, \end{aligned} \quad (3)$$

where  $\mathbf{g}_l(\mathbf{x}) = \mathbf{h}'_L \circ \dots \circ \mathbf{h}'_{l+1} \circ \mathbf{h}_l \circ \dots \circ \mathbf{h}_1(\mathbf{x})$ . It then suffices to bound  $\sup_{\|\mathbf{x}\|_\infty \leq 1} \|\mathbf{g}_l(\mathbf{x}) - \mathbf{g}_{l-1}(\mathbf{x})\|_2$  for  $l = 1, \dots, L$  separately.

Before we proceed, we first bound

$$\sup_{\|\mathbf{x}\|_\infty \leq 1} \|\mathbf{h}_l \circ \dots \circ \mathbf{h}_1(\mathbf{x})\|_\infty \leq (WB)^l \left(1 + \frac{B}{WB-1}\right) - \frac{B}{WB-1} \triangleq E_l, \quad (4)$$

for any  $l \geq 1$  by mathematical induction. When  $l = 1$ , note that the ReLU function is a Lipschitz-1 function, then we have

$$\sup_{\|\mathbf{x}\|_\infty \leq 1} |h_{1i}(\mathbf{x})| \leq \sup_{\|\mathbf{x}\|_\infty \leq 1} \sum_{j=1}^D |A_{1ij}| \cdot |x_j| + |b_{1i}| \leq WB + B = E_1,$$

for  $i = 1, \dots, p_1$ . It then follows that  $\sup_{\|\mathbf{x}\|_\infty \leq 1} \|\mathbf{h}_1(\mathbf{x})\|_\infty \leq E_1$ . Next, suppose that equation 4 holds true for  $l \leq k-1$ , then

$$\begin{aligned} \sup_{\|\mathbf{x}\|_\infty \leq 1} |h_{ki} \circ \dots \circ \mathbf{h}_1(\mathbf{x})| &\leq \sup_{\|\mathbf{x}\|_\infty \leq E_{k-1}} |h_{ki}(\mathbf{x})| \leq \sup_{\|\mathbf{x}\|_\infty \leq E_{k-1}} \sum_{j=1}^{p_{k-1}} |A_{kij}| \cdot |x_j| + |b_{ki}| \\ &\leq WBE_{k-1} + B = (WB)^k \left(1 + \frac{B}{WB-1}\right) - \frac{B}{WB-1} = E_k, \end{aligned}$$

for  $i = 1, \dots, p_k$ . It then follows that  $\sup_{\|\mathbf{x}\|_\infty \leq 1} \|\mathbf{h}_k \circ \dots \circ \mathbf{h}_1(\mathbf{x})\|_\infty \leq E_k$ , and thus equation 4 holds true for any  $l \geq 1$ .

We now turn to bound  $\sup_{\|\mathbf{x}\|_\infty \leq 1} \|\mathbf{g}_l(\mathbf{x}) - \mathbf{g}_{l-1}(\mathbf{x})\|_2$ . Note that

$$\begin{aligned} \sup_{\|\mathbf{x}\|_\infty \leq 1} \|\mathbf{g}_l(\mathbf{x}) - \mathbf{g}_{l-1}(\mathbf{x})\|_2 &\leq \sum_{i=1}^p \sup_{\|\mathbf{x}\|_\infty \leq 1} |g_{li}(\mathbf{x}) - g_{l-1,i}(\mathbf{x})| \\ &= \sum_{i=1}^p \sup_{\|\mathbf{x}\|_\infty \leq 1} \left| h'_{Li} \circ \dots \circ h'_{l+1} \circ \mathbf{h}_l \circ \dots \circ \mathbf{h}_1(\mathbf{x}) - h'_{Li} \circ \dots \circ \mathbf{h}'_l \circ \mathbf{h}_{l-1} \circ \dots \circ \mathbf{h}_1(\mathbf{x}) \right| \\ &\leq \sum_{i=1}^p \sup_{\|\mathbf{x}\|_\infty \leq E_{l-1}} \left| h'_{Li} \circ \dots \circ \mathbf{h}'_{l+1} \circ \mathbf{h}_l(\mathbf{x}) - h'_{Li} \circ \dots \circ \mathbf{h}'_{l+1} \circ \mathbf{h}'_l(\mathbf{x}) \right| \\ &\leq \sum_{i=1}^p \sup_{\|\mathbf{x} - \mathbf{x}'\|_\infty \leq \epsilon(WE_{l-1} + 1)} \left| h'_{Li} \circ \dots \circ \mathbf{h}'_{l+1}(\mathbf{x}) - h'_{Li} \circ \dots \circ \mathbf{h}'_{l+1}(\mathbf{x}') \right| \\ &\leq p\epsilon(WB)^{L-l}(WE_{l-1} + 1), \end{aligned}$$

where  $\mathbf{g} = (g_{l1}, \dots, g_{lp})$ , the second inequality follows from the fact that

$$\sup_{\|\mathbf{x}\|_\infty \leq E_{l-1}} |h_{li}(\mathbf{x}) - h'_{li}(\mathbf{x})| \leq \sup_{\|\mathbf{x}\|_\infty \leq E_{l-1}} \sum_{j=1}^{p_{l-1}} |A_{lij} - A'_{lij}| \cdot |x_j| + |b_{li} - b'_{li}| \leq \epsilon(WE_{l-1} + 1),$$

and the last inequality is derived by repeatedly using the fact that  $\sup_{\|\mathbf{x} - \mathbf{x}'\|_\infty \leq E} |h_{li}(\mathbf{x}) - h_{li}(\mathbf{x}')| \leq WBE$  for any  $E \geq 0$  and  $l \geq 1$ .

Therefore, after plugging the definition of  $E_l$  in equation 4, we have

$$\begin{aligned} \sup_{\|\mathbf{x}\| \leq 1} \|\mathbf{f}(\mathbf{x}) - \mathbf{f}'(\mathbf{x})\|_2 &\leq \sum_{l=1}^L \sup_{\|\mathbf{x}\| \leq 1} \|\mathbf{g}_l(\mathbf{x}) - \mathbf{g}_{l-1}(\mathbf{x})\|_2 \\ &\leq \sum_{l=1}^L p\epsilon \left( (WB)^L \left( \frac{1}{B} + \frac{1}{WB-1} \right) - \frac{(WB)^{L-l}}{WB-1} \right) \\ &= p\epsilon \left( (WB)^L \left( \frac{L}{B} + \frac{L}{WB-1} \right) - \frac{(WB)^L - 1}{(WB-1)^2} \right). \end{aligned}$$

This completes the proof of Lemma 2.  $\blacksquare$

**Proof of Lemma 3:** For any  $R \in \mathcal{R}^\Phi$ , we have  $R(\mathbf{x}_u, \tilde{\mathbf{x}}_i) = \langle \mathbf{f}(\mathbf{x}_u), \tilde{\mathbf{f}}(\tilde{\mathbf{x}}_i) \rangle$ , where  $\mathbf{f}(\mathbf{x}_u) \in \mathcal{F}_{D_u}(W, L, B, M)$  and  $\tilde{\mathbf{f}}(\tilde{\mathbf{x}}_i) \in \mathcal{F}_{D_i}(\tilde{W}, \tilde{L}, \tilde{B}, M)$ . It follows from Lemma 2 that there exists mappings  $Q_u : \mathcal{F}_{D_u}(W, L, B, M) \rightarrow \mathcal{K}_{D_u}(W, L, B, M)$  and  $Q_i : \mathcal{F}_{D_i}(\tilde{W}, \tilde{L}, \tilde{B}, M) \rightarrow \mathcal{K}_{D_i}(\tilde{W}, \tilde{L}, \tilde{B}, M)$  such that

$$R(\mathbf{x}_u, \tilde{\mathbf{x}}_i) = \langle \mathbf{f}(\mathbf{x}_u), \tilde{\mathbf{f}}(\tilde{\mathbf{x}}_i) \rangle = \langle Q_u(\mathbf{f})(\mathbf{x}_u), Q_i(\tilde{\mathbf{f}})(\tilde{\mathbf{x}}_i) \rangle,$$

for any  $(\mathbf{x}_u, \tilde{\mathbf{x}}_i) \in \text{Supp}(\mu_{ui})$ .

Let  $\Theta_Q$  and  $\tilde{\Theta}_Q$  denote the effective parameters of  $Q_u(\mathbf{f})$  and  $Q_i(\tilde{\mathbf{f}})$ , then  $R$  can be parametrized by  $\Lambda_Q = (\Theta_Q, \tilde{\Theta}_Q)$ . Let  $\mathcal{Q} = \{\Lambda_Q : R(\cdot; \Lambda_Q) \in \mathcal{R}^\Phi\}$  and  $\mathcal{G} = \{\Lambda_Q^{(1)}, \dots, \Lambda_Q^{(N)}\}$  be an  $\epsilon/2$ -covering set of  $\mathcal{Q}$  under the  $\|\cdot\|_\infty$  metric. For any  $R(\cdot; \Lambda_Q) \in \mathcal{R}^\Phi$ , there exists  $\Lambda'_Q \in \mathcal{G}$  such that  $\|\Lambda_Q - \Lambda'_Q\|_\infty < \epsilon/2$ , and thus

$$\begin{aligned} \sup_{\|(\mathbf{x}_u, \tilde{\mathbf{x}}_i)\|_\infty \leq 1} |R(\mathbf{x}_u, \tilde{\mathbf{x}}_i) - R'(\mathbf{x}_u, \tilde{\mathbf{x}}_i)| &= \sup_{\|(\mathbf{x}_u, \tilde{\mathbf{x}}_i)\|_\infty \leq 1} |\langle \mathbf{f}(\mathbf{x}_u), \tilde{\mathbf{f}}(\tilde{\mathbf{x}}_i) \rangle - \langle \mathbf{f}'(\mathbf{x}_u), \tilde{\mathbf{f}}'(\tilde{\mathbf{x}}_i) \rangle| \\ &\leq \sup_{\|(\mathbf{x}_u, \tilde{\mathbf{x}}_i)\|_\infty \leq 1} |\langle \mathbf{f}(\mathbf{x}_u), \tilde{\mathbf{f}}(\tilde{\mathbf{x}}_i) - \tilde{\mathbf{f}}'(\tilde{\mathbf{x}}_i) \rangle| + \sup_{\|(\mathbf{x}_u, \tilde{\mathbf{x}}_i)\|_\infty \leq 1} |\langle \mathbf{f}(\mathbf{x}_u) - \mathbf{f}'(\mathbf{x}_u), \tilde{\mathbf{f}}'(\tilde{\mathbf{x}}_i) \rangle| \\ &\leq \sup_{\|(\mathbf{x}_u, \tilde{\mathbf{x}}_i)\|_\infty \leq 1} \|\mathbf{f}(\mathbf{x}_u)\|_2 \|\tilde{\mathbf{f}}(\tilde{\mathbf{x}}_i) - \tilde{\mathbf{f}}'(\tilde{\mathbf{x}}_i)\|_2 + \sup_{\|(\mathbf{x}_u, \tilde{\mathbf{x}}_i)\|_\infty \leq 1} \|\mathbf{f}(\mathbf{x}_u) - \mathbf{f}'(\mathbf{x}_u)\|_2 \|\tilde{\mathbf{f}}'(\tilde{\mathbf{x}}_i)\|_2 \\ &\leq 2Mp^{1/2} \left( \sup_{\|\tilde{\mathbf{x}}_i\|_\infty \leq 1} \|Q_i(\tilde{\mathbf{f}})(\tilde{\mathbf{x}}_i) - Q_i(\tilde{\mathbf{f}}')(\tilde{\mathbf{x}}_i)\|_2 + \sup_{\|\mathbf{x}_u\|_\infty \leq 1} \|Q_u(\mathbf{f})(\mathbf{x}_u) - Q_u(\mathbf{f}')(\mathbf{x}_u)\|_2 \right) \\ &\leq \epsilon Mp^{3/2} (C(W, L, B) + C(\tilde{W}, \tilde{L}, \tilde{B})) \triangleq C_4\epsilon, \end{aligned} \quad (5)$$

where the last inequality follows from Lemma 2.

For each  $\Lambda_Q^{(n)} \in \mathcal{G}$ , we define a  $C_4\epsilon$ -bracket as

$$g_n^U(\mathbf{x}_u, \tilde{\mathbf{x}}_i) = R(\mathbf{x}_u, \tilde{\mathbf{x}}_i; \Lambda_Q^{(n)}) + \frac{C_4\epsilon}{2}, g_n^L(\mathbf{x}_u, \tilde{\mathbf{x}}_i) = R(\mathbf{x}_u, \tilde{\mathbf{x}}_i; \Lambda_Q^{(n)}) - \frac{C_4\epsilon}{2}.$$

Combined with (5), it follows that for any  $\Lambda_Q \in \mathcal{Q}$ , there exists  $1 \leq k \leq N$  such that

$$\begin{aligned} g_k^U(\mathbf{x}_u, \tilde{\mathbf{x}}_i) - R(\mathbf{x}_u, \tilde{\mathbf{x}}_i; \Lambda_Q) &\geq \frac{C_4\epsilon}{2} - |R(\mathbf{x}_u, \tilde{\mathbf{x}}_i; \Lambda_Q) - R(\mathbf{x}_u, \tilde{\mathbf{x}}_i; \Lambda_Q^{(k)})| \geq 0, \\ g_k^L(\mathbf{x}_u, \tilde{\mathbf{x}}_i) - R(\mathbf{x}_u, \tilde{\mathbf{x}}_i; \Lambda_Q) &\leq |R(\mathbf{x}_u, \tilde{\mathbf{x}}_i; \Lambda_Q) - R(\mathbf{x}_u, \tilde{\mathbf{x}}_i; \Lambda_Q^{(k)})| - \frac{C_4\epsilon}{2} \leq 0, \end{aligned}$$

for any  $(\mathbf{x}_u, \tilde{\mathbf{x}}_i) \in \text{Supp}(\mu_{ui})$ . Therefore,  $\mathcal{B} = \{[g_1^L, g_1^U], [g_2^L, g_2^U], \dots, [g_N^L, g_N^U]\}$  forms a  $C_4\epsilon$ -bracketing set of  $\mathcal{R}^\Phi$  under the  $\|\cdot\|_{L^2(\mu_{ui})}$  metric.

By Lemma 2, the size of  $\Lambda_Q$  is at most  $14LW \log W + 14\tilde{L}\tilde{W} \log \tilde{W}$ . Combined with the definition of  $\mathcal{G}$ , this yields that

$$\log N \leq (14LW \log W + 14\tilde{L}\tilde{W} \log \tilde{W}) \log \left( \epsilon^{-1} 2 \max\{B, \tilde{B}\} \right).$$

Substituting  $\epsilon$  by  $\tilde{\epsilon}/C_4$  leads to the desired upper bound immediately.  $\blacksquare$

**Proof of Theorem 2:** Let  $L_{ui} = \max\{L, \tilde{L}\}$ ,  $\eta_{|\Omega|}^2 = L_{ui}|\Omega|^{-2\beta/(2\beta+d_{ui})} \log^2 |\Omega|$ ,  $\mathcal{M} = \{R \in \mathcal{R}^\Phi : \|R - R^*\|_{L^2(\mu_{ui})}^2 > \eta_{|\Omega|}^2\}$ , and let  $R_0 \in \mathcal{R}^\Phi$  satisfy  $\|R_0 - R^*\|_{L^\infty(\mu_{ui})}^2 \leq \eta_{|\Omega|}^2/4$ . Further, we denote  $\|R - K\|_\Omega^2 = \frac{1}{|\Omega|} \sum_{(u,i) \in \Omega} (R(\mathbf{x}_u, \tilde{\mathbf{x}}_i) - K_{ui})^2$ , and then it follows from the definition of  $\hat{R}$  that

$$\begin{aligned} &P(\|\hat{R} - R^*\|_{L^2(\mu_{ui})}^2 > \eta_{|\Omega|}^2) \\ &\leq P\left(\sup_{R \in \mathcal{M}} (\|R_0 - R\|_\Omega^2 + \lambda_{|\Omega|} J_0 - \|R - K\|_\Omega^2 - \lambda_{|\Omega|} J(R)) \geq 0\right) \equiv I, \end{aligned}$$

where  $J_0 = J(R_0)$ . We further decompose  $\mathcal{M}$  into small subsets. Specifically, we let  $\mathcal{M}_{ij} = \{R \in \mathcal{R}^\Phi : 2^{i-1}\eta_{|\Omega|}^2 < \|R - R^*\|_{L^2(\mu_{ui})}^2 \leq 2^i\eta_{|\Omega|}^2, 2^{j-1}J_0 < J(R) \leq 2^jJ_0\}$  for  $i, j \geq 1$ , and  $\mathcal{M}_{i0} = \{R \in \mathcal{R}^\Phi : 2^{i-1}\eta_{|\Omega|}^2 < \|R -$

$R^*\|_{L^2(\mu_{ui})}^2 \leq 2^i \eta_{|\Omega|}^2, J(R) \leq J_0\}$  for  $i \geq 1$ . Then we have

$$\begin{aligned}
I &\leq \sum_{i=1}^{\infty} \sum_{j=0}^{\infty} P\left(\sup_{R \in \mathcal{M}_{ij}} (\|R_0 - K\|_{\Omega}^2 + \lambda_{|\Omega|} J_0 - \|R - K\|_{\Omega}^2 - \lambda_{|\Omega|} J(R)) \geq 0\right) \\
&= \sum_{i,j=1}^{\infty} P\left(\sup_{R \in \mathcal{M}_{ij}} (\|R_0 - K\|_{\Omega}^2 + \lambda_{|\Omega|} J_0 - \|R - K\|_{\Omega}^2 - \lambda_{|\Omega|} J(R)) \geq 0\right) \\
&\quad + \sum_{i=1}^{\infty} P\left(\sup_{R \in \mathcal{M}_{i0}} (\|R_0 - K\|_{\Omega}^2 + \lambda_{|\Omega|} J_0 - \|R - K\|_{\Omega}^2 - \lambda_{|\Omega|} J(R)) \geq 0\right) \equiv I_1 + I_2.
\end{aligned}$$

It thus suffices to bound  $I_1$  and  $I_2$  separately.

Let  $\epsilon = K - R^*$ , then we have

$$\|R - K\|_{\Omega}^2 = \|R - R^*\|_{\Omega}^2 + \|\epsilon\|_{\Omega}^2 - \frac{2}{|\Omega|} \sum_{(u,i) \in \Omega} \epsilon_{ui} (R(\mathbf{x}_u, \tilde{\mathbf{x}}_i) - R^*(\mathbf{x}_u, \tilde{\mathbf{x}}_i)).$$

Therefore,  $\mathbb{E}\|R - K\|_{\Omega}^2 = \|R - R^*\|_{L^2(\mu_{ui})}^2 + \mathbb{E}\|\epsilon\|_{\Omega}^2$ , and thus

$$\begin{aligned}
\mathbb{E}(\|R - K\|_{\Omega}^2 - \|R_0 - K\|_{\Omega}^2) &= \|R - R^*\|_{L^2(\mu_{ui})}^2 - \|R_0 - R^*\|_{L^2(\mu_{ui})}^2 \\
&\geq \|R - R^*\|_{L^2(\mu_{ui})}^2 - \eta_{|\Omega|}^2/4.
\end{aligned}$$

Let  $E_{\Omega}(R) = \|R - K\|_{\Omega}^2 - \mathbb{E}(\|R - K\|_{\Omega}^2)$ , then we have

$$\begin{aligned}
&P\left(\sup_{R \in \mathcal{M}_{ij}} (\|R_0 - K\|_{\Omega}^2 + \lambda_{|\Omega|} J(R_0) - \|R - K\|_{\Omega}^2 - \lambda_{|\Omega|} J(R)) \geq 0\right) \\
&= P\left(\sup_{R \in \mathcal{M}_{ij}} (E_{\Omega}(R_0) - E_{\Omega}(R)) \geq \inf_{R \in \mathcal{M}_{ij}} \lambda_{|\Omega|} (J(R) - J(R_0)) + \inf_{R \in \mathcal{M}_{ij}} \mathbb{E}(\|R - K\|_{\Omega}^2 - \|R_0 - K\|_{\Omega}^2)\right) \\
&\leq P\left(\sup_{R \in \mathcal{M}_{ij}} (E_{\Omega}(R_0) - E_{\Omega}(R)) \geq \inf_{R \in \mathcal{M}_{ij}} \lambda_{|\Omega|} (J(R) - J(R_0)) + \inf_{R \in \mathcal{M}_{ij}} \|R - R^*\|_{L^2(\mu_{ui})}^2 - \eta_{|\Omega|}^2/4\right) \\
&\leq P\left(\sup_{R \in \mathcal{M}_{ij}} (E_{\Omega}(R_0) - E_{\Omega}(R)) \geq (2^{j-1} - 1)\lambda_{|\Omega|} J_0 + (2^{i-1} - 1/4)\eta_{|\Omega|}^2\right) \\
&= P\left(\sup_{R \in \mathcal{M}_{ij}} (E_{\Omega}(R_0) - E_{\Omega}(R)) \geq M(i, j)\right),
\end{aligned}$$

where  $M(i, j) = (2^{j-1} - 1)\lambda_{|\Omega|} J_0 + (2^{i-1} - 1/4)\eta_{|\Omega|}^2$ .

Next, it follows from the assumption  $\lambda_{|\Omega|} J_0 \leq 1/4\eta_{|\Omega|}^2$  that

$$\begin{aligned}
& \sup_{R \in \mathcal{M}_{ij}} \text{Var} \left( (R(\mathbf{x}_u, \tilde{\mathbf{x}}_i) - K_{ui})^2 - (R_0(\mathbf{x}_u, \tilde{\mathbf{x}}_i) - K_{ui})^2 \right) \\
&= \sup_{R \in \mathcal{M}_{ij}} \text{Var} \left( (R(\mathbf{x}_u, \tilde{\mathbf{x}}_i) - R^*(\mathbf{x}_u, \tilde{\mathbf{x}}_i))^2 - (R_0(\mathbf{x}_u, \tilde{\mathbf{x}}_i) - R^*(\mathbf{x}_u, \tilde{\mathbf{x}}_i))^2 \right) \\
&\quad + \text{Var} \left( 2\epsilon_{ui}(R(\mathbf{x}_u, \tilde{\mathbf{x}}_i) - R_0(\mathbf{x}_u, \tilde{\mathbf{x}}_i)) \right) \\
&\leq \sup_{R \in \mathcal{M}_{ij}} 2\text{Var} \left( (R(\mathbf{x}_u, \tilde{\mathbf{x}}_i) - R^*(\mathbf{x}_u, \tilde{\mathbf{x}}_i))^2 \right) + 2\text{Var} \left( (R_0(\mathbf{x}_u, \tilde{\mathbf{x}}_i) - R^*(\mathbf{x}_u, \tilde{\mathbf{x}}_i))^2 \right) \\
&\quad + 4\mathbb{E}\epsilon_{ui}^2 \sup_{R \in \mathcal{M}_{ij}} \mathbb{E}(R(\mathbf{x}_u, \tilde{\mathbf{x}}_i) - R_0(\mathbf{x}_u, \tilde{\mathbf{x}}_i))^2 \\
&\leq 2 \sup_{R \in \mathcal{M}_{ij}} \mathbb{E}(R(\mathbf{x}_u, \tilde{\mathbf{x}}_i) - R^*(\mathbf{x}_u, \tilde{\mathbf{x}}_i))^4 + 2\mathbb{E}((R_0(\mathbf{x}_u, \tilde{\mathbf{x}}_i) - R^*(\mathbf{x}_u, \tilde{\mathbf{x}}_i))^2) \\
&\quad + 4\sigma^2 \sup_{R \in \mathcal{M}_{ij}} \mathbb{E}(R(\mathbf{x}_u, \tilde{\mathbf{x}}_i) - R_0(\mathbf{x}_u, \tilde{\mathbf{x}}_i))^2 \\
&\leq \sup_{R \in \mathcal{M}_{ij}} (50p^2 M^4 + 4\sigma^2) (\|R - R^*\|_{L^2(\mu_{ui})}^2 + \|R_0 - R^*\|_{L^2(\mu_{ui})}^2) \\
&\leq (50p^2 M^4 + 4\sigma^2) (2^i \eta_{|\Omega|}^2 + \frac{1}{4} \eta_{|\Omega|}^2) \leq C_5 M(i, j) \equiv v(i, j),
\end{aligned} \tag{6}$$

where  $C_5 = 16 \max\{(50p^2 M^4 + 4\sigma^2), 1\}(25p^2 M^4 + B_e^2)$ .

In the following, we proceed to verify conditions (4.5)-(4.7) in Shen and Wong (1994). First, the relation between  $M(i, j)$  and  $v(i, j)$  in (6) directly implies (4.6) with  $T = 2(25p^2 M^4 + B_e^2)$  and  $\epsilon = 1/2$ . Second, we let  $\mathcal{R}^\Phi(\tau) = \{R \in \mathcal{R}^\Phi : J(R) \leq \tau J_0\}$ , and note that  $J(R) \leq \tau J_0$  implies that  $\max\{B, \tilde{B}\} \leq \sqrt{\tau J_0}$ . Then it follows from Lemma 3 that

$$\log \mathcal{N}_{[\cdot]}(\epsilon, \mathcal{R}^\Phi(\tau), \|\cdot\|_{L^2(\mu_{ui})}) \leq C_2(W \log W + \tilde{W} \log \tilde{W}) \log(C_6 \epsilon^{-1}),$$

where  $C_6 = C_3(C(W, L, \sqrt{\tau J_0}) + C(\tilde{W}, \tilde{L}, \sqrt{\tau J_0}))$ , and  $C_2$  and  $C_3$  are defined as in Lemma 3. It then follows that

$$\begin{aligned}
& \int_{\frac{\epsilon}{32} M(i, j)}^{v^{1/2}(i, j)} \sqrt{\log \mathcal{N}_{[\cdot]}(u, \mathcal{R}^\Phi(\tau), \|\cdot\|_{L^2(\mu_{ui})})} du / M(i, j) \\
& \leq \int_{\frac{\epsilon}{32} M(i, j)}^{v^{1/2}(i, j)} \sqrt{C_2(W \log W + \tilde{W} \log \tilde{W}) \log(C_6 u^{-1})} du / M(i, j).
\end{aligned} \tag{7}$$

Notice that the right-hand side of (7) is non-increasing in  $i$  and  $M(i, j)$ , it then follows that

$$\begin{aligned}
& \int_{\frac{\epsilon}{32} M(i, j)}^{v^{1/2}(i, j)} \sqrt{C_2(W \log W + \tilde{W} \log \tilde{W}) \log(C_6 u^{-1})} du / M(i, j) \\
& \leq \int_{\frac{\epsilon}{32} M(1, j)}^{v^{1/2}(1, j)} \sqrt{C_2(W \log W + \tilde{W} \log \tilde{W}) \log(C_6 u^{-1})} du / M(1, j).
\end{aligned} \tag{8}$$

Note that  $W$  and  $\tilde{W}$  are adaptive parameters governing the rate of approximation error  $\|R_0 - R^*\|_{L^\infty(\mu_{ui})}$ , which must satisfy  $\|R_0 - R^*\|_{L^\infty(\mu_{ui})} \leq 1/2\eta_{|\Omega|}$ . Thus, (4.7) holds by setting  $W = O(|\Omega|^{d_{ui}/(2\beta+d_{ui})} \log |\Omega|)$  and  $\tilde{W} = O(|\Omega|^{d_{ui}/(2\beta+d_{ui})} \log |\Omega|)$ , and (4.7) directly implies (4.5). By Theorem 3 in Shen and Wong (1994) with  $M =$

$|\Omega|^{1/2}M(i, j)$  and  $v = v(i, j)$ , we have

$$\begin{aligned}
I_1 &\leq \sum_{j=1}^{\infty} \sum_{i=1}^{\infty} 3 \exp\left(-\frac{(1-\epsilon)|\Omega|M(i, j)^2}{2(4C_5M(i, j) + M(i, j)T/3)}\right) \\
&\leq 3 \sum_{j=1}^{\infty} \sum_{i=1}^{\infty} \exp\left(-C_7(1-\epsilon)|\Omega|((2^{j-1}-1)\lambda_{|\Omega|}J_0 + (2^{i-1}-1/4)\eta_{|\Omega|}^2)\right) \\
&\leq 3 \sum_{i=1}^n \exp(-C_7(1-\epsilon)|\Omega|(i-1/4)\eta_{|\Omega|}^2) \sum_{j=1}^n \exp(-C_7(1-\epsilon)|\Omega|(j-1)\lambda_{|\Omega|}J_0) \\
&\leq 3 \frac{\exp(-C_7(1-\epsilon)|\Omega|\eta_{|\Omega|}^2/4)}{1 - \exp(-C_7(1-\epsilon)|\Omega|\eta_{|\Omega|}^2)} \frac{1}{1 - \exp(-C_7(1-\epsilon)|\Omega|\lambda_{|\Omega|}J_0)} \\
&\leq 3 \frac{\exp(-C_7(1-\epsilon)|\Omega|\eta_{|\Omega|}^2/4)}{(1 - \exp(-C_7(1-\epsilon)|\Omega|\eta_{|\Omega|}^2/4))^2}, \tag{9}
\end{aligned}$$

where  $C_7 = 3/(26C_5)$  and the last inequality follows from the fact that  $\lambda_{|\Omega|}J_0 \leq 1/4\eta_{|\Omega|}^2$ .

Similarly,  $I_2$  can be bounded by

$$\begin{aligned}
I_2 &\leq \sum_{i=1}^n 3 \exp\left(-\frac{(1-\epsilon)|\Omega|M^2(i, 0)}{2(4v(i, 0) + M(i, 0)T/3)}\right) \leq \sum_{i=1}^n 3 \exp(-C_7(1-\epsilon)|\Omega|M(i, 0)) \\
&\leq \sum_{i=1}^{\infty} 3 \exp(-C_7(1-\epsilon)|\Omega|(2^{i-1}-1/2)\eta_{|\Omega|}^2) \leq 3 \frac{\exp(-C_7(1-\epsilon)|\Omega|\eta_{|\Omega|}^2/2)}{1 - \exp(-C_7(1-\epsilon)|\Omega|\eta_{|\Omega|}^2)}. \tag{10}
\end{aligned}$$

Combining (9) and (10), we have

$$I \leq I_1 + I_2 \leq 3 \frac{\exp(-C_7(1-\epsilon)|\Omega|\eta_{|\Omega|}^2/4)}{(1 - \exp(-C_7(1-\epsilon)|\Omega|\eta_{|\Omega|}^2/4))^2} + 3 \frac{\exp(-C_7(1-\epsilon)|\Omega|\eta_{|\Omega|}^2/2)}{1 - \exp(-C_7(1-\epsilon)|\Omega|\eta_{|\Omega|}^2)}.$$

Let  $s = \exp(-C_7(1-\epsilon)|\Omega|\eta_{|\Omega|}^2/4)$ , then

$$I \leq \frac{3s^2}{(1-s)^2} + \frac{3s^2}{1-s^4} \leq \frac{3s^2}{(1-s)^2} + \frac{3s^2}{1-s} = \frac{6s^2 - 3s^3}{(1-s)^2} \leq 24s^2,$$

as  $s \leq 1/2$ . The desired result then follows immediately. ■

## REFERENCES

- Nakada, R. and Imaizumi, M. (2020). Adaptive approximation and generalization of deep neural network with intrinsic dimensionality. *Journal of Machine Learning Research*, 21(174):1–38.
- Shen, X. and Wong, W. H. (1994). Convergence rate of sieve estimates. *The Annals of Statistics*, pages 580–615.
